# Supplementary material
Source: publisher figshare collection journal article supplement (https://sage.figshare.com/ndownloader/files/21849708)
Supplement: Supplementary file 1 [file 21849708]

**List of Partnerships**

Sustainability NJ

Green Team (in several different townships)

Mullica Schools

Cookie Tin

Stockton University

ACUA Forsoil

Local Food Banks

Aero Garden

Atlantic Nursey

Lowes

Catawba Project

Project Wet

Eagle Academy

Home Depot

ACE program

Mullica Township Public Works

Sustainable Mullica

Galloway Nursey

NJ Agriculture Society

Dennisville Fence

Rutgers University

Boost Youth Center

Senior Citizen Groups

Marrone Irrigation

Community Wellness Committees

Slow Food USA

Let Us Eat Please

Faria Surf and Sport

Folsom Falcon Club

Galloway CSA

ShopRite Dietician

Impact Harvest

Fitness and Wellness Practitioners

AtlantiCare Garden Club

Home and School Association

Sodexa

NJ Fresh Fruits & Vegetables Program

Greater Egg Harbor Watershed Association

PTA/PTO

SNAP – ED

Community Food Bank of NJ

Boy Scouts

Atlantic City Country Club
